# Supplementary material
Source: HighWire-hosted journal article supplement (https://erj.ersjournals.com/content/54/6/1901898)
Supplement: inline-supplementary-material-1 [file inline-supplementary-material-1.pdf]

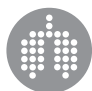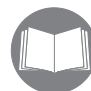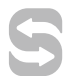

SHAREABLE PDF

# Hot off the press: downregulation of PRMT1 for long-lasting effects of bronchial thermoplasty

Siti Farah Rahmawati<sup>1,2</sup> and Reinoud Gosens<sup>1</sup>

**Affiliations:** <sup>1</sup>Dept of Molecular Pharmacology and GRIAC Research Institute, University of Groningen, Groningen, The Netherlands. <sup>2</sup>Dept of Pharmacology-Clinical Pharmacy, School of Pharmacy, Institut Teknologi Bandung, Bandung, Indonesia.

**Correspondence:** Reinoud Gosens, A. Deusinglaan 1, 9713 AV Groningen, The Netherlands.  
E-mail: r.gosens@rug.nl

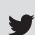

@ERSpublications

**An epithelial–mesenchymal interaction governed by HSP60-regulated PRMT1 expression regulates airway remodelling and is reversed by bronchial thermoplasty** <http://bit.ly/2NDCKGW>

**Cite this article as:** Rahmawati SF, Gosens R. Hot off the press: downregulation of PRMT1 for long-lasting effects of bronchial thermoplasty. *Eur Respir J* 2019; 54: 1901898 [<https://doi.org/10.1183/13993003.01898-2019>].

This single-page version can be shared freely online.

Asthma is broadly defined as a group of clinical symptoms with reversible expiratory airflow limitation or bronchial hyperresponsiveness with or without airway inflammation [1]. These symptoms are associated with airway remodelling, particularly in severe asthma patients, which is characterised by alterations of the tissue structure and cells within the airway, including increased submucosal extracellular matrix deposition, reticular basement membrane (RBM) thickening, airway smooth muscle (ASM) hyperplasia and hypertrophy, bronchial microvascular remodelling and mucous cell metaplasia [2–4].
